# Supplementary material for: Three Inulin-Type Fructans from Codonopsis pilosula (Franch.) Nannf. Roots and Their Prebiotic Activity on Bifidobacterium longum
Source: PubMed Central journal article supplement (PMC6320984; doi:10.3390/molecules23123123), 2018-11-29
Supplement: molecules-23-03123-s001.pdf [file molecules-23-03123-s001.pdf]

# **Inulin-Type Fructans from *Codonopsis pilosula* (Franch.) Nannf. Roots and Their Prebiotic Activity on *Bifidobacterium longum***

Jiankuan Li<sup>a, b</sup>, Xin Zhang<sup>a</sup>, Lingya Cao<sup>a, c</sup>, Jiaojiao Ji<sup>a, b</sup>, Jianping Gao<sup>\*a, b</sup>

<sup>a</sup> School of Pharmaceutical Science, Shanxi Medical University, Taiyuan 030001, China; [jjankuanli@sxmu.edu.cn](mailto:jjankuanli@sxmu.edu.cn) (J. Li); [zhangxin201689@163.com](mailto:zhangxin201689@163.com) (X. Zhang); [caolingyablue2008@163.com](mailto:caolingyablue2008@163.com) (L. Cao); [jjjiao963@163.com](mailto:jjjiao963@163.com) (J. Ji)

<sup>b</sup> The Engineering Technology Research Center of Authentic Herbal Material Resources Development of Shanxi Province, Shanxi Medical University, Taiyuan 030001, China

<sup>c</sup> School of Basic Medical Science, Shanxi Medical University, Taiyuan 030001, China

\*Correspondence: [jpgao123@163.com](mailto:jpgao123@163.com); Tel: +86-351-3985-244

## **Content**

S1: HSQC spectrum of Fructan 1.

S2: HMBC spectrum of Fructan 1.

S3: HSQC spectrum of Fructan 2.

S4: HMBC spectrum of Fructan 2.

S5: HSQC spectrum of Fructan 3.

S6: HMBC spectrum of Fructan 3.

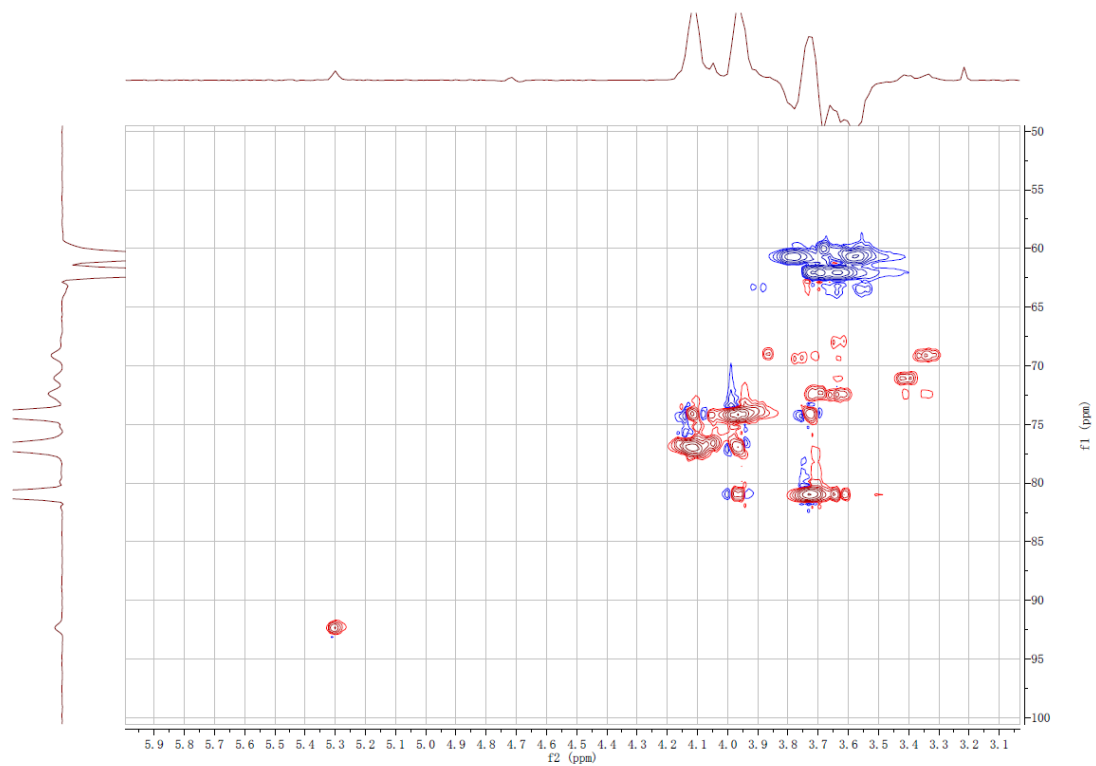

**S1: HSQC spectrum of Fructan 1.**

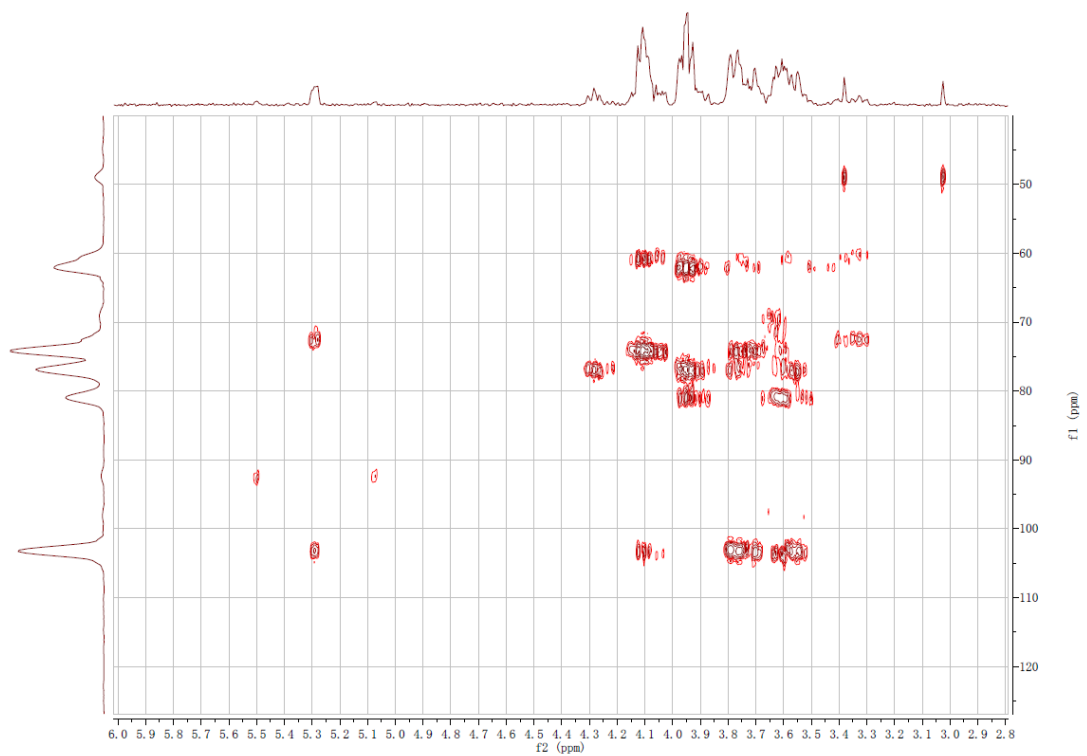

**S2: HMBC spectrum of Fructan 1.**

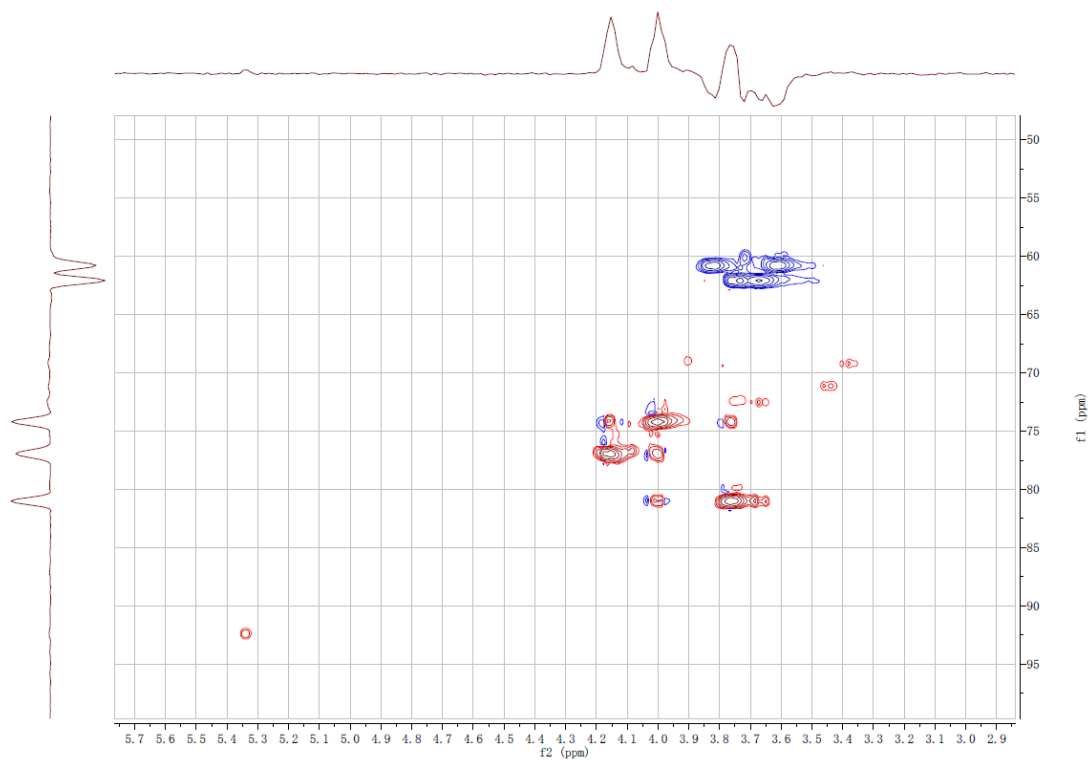

**S3: HSQC spectrum of Fructan 2.**

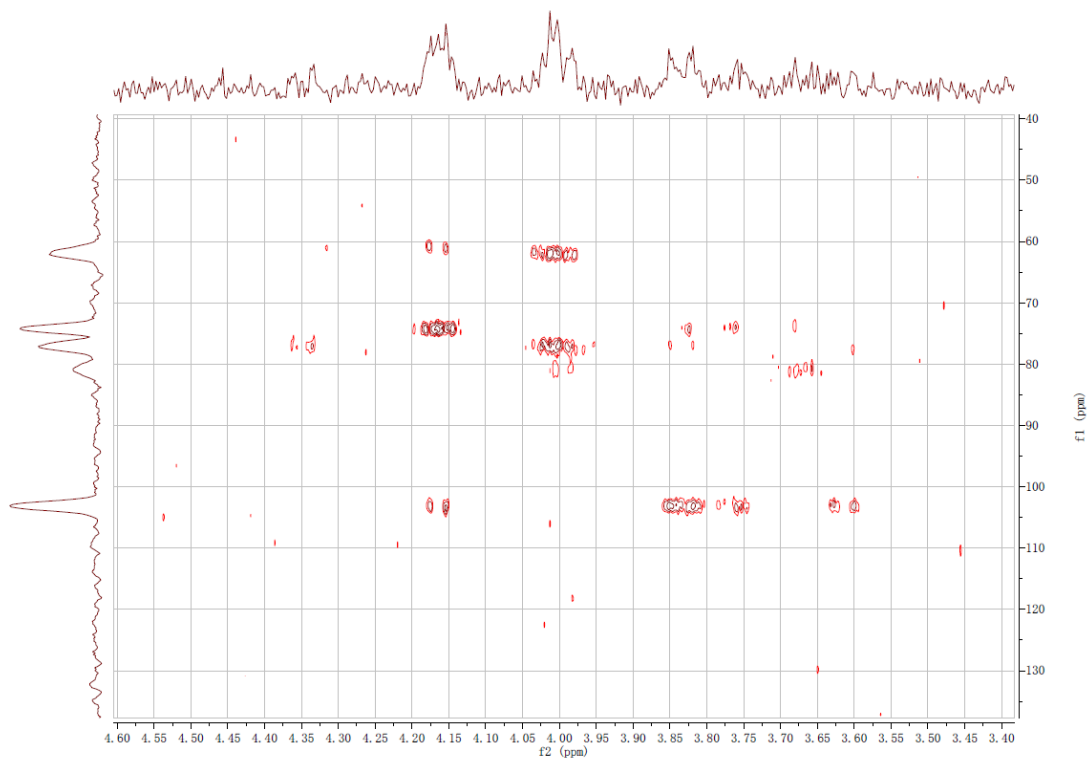

**S4: HMBC spectrum of Fructan 2.**

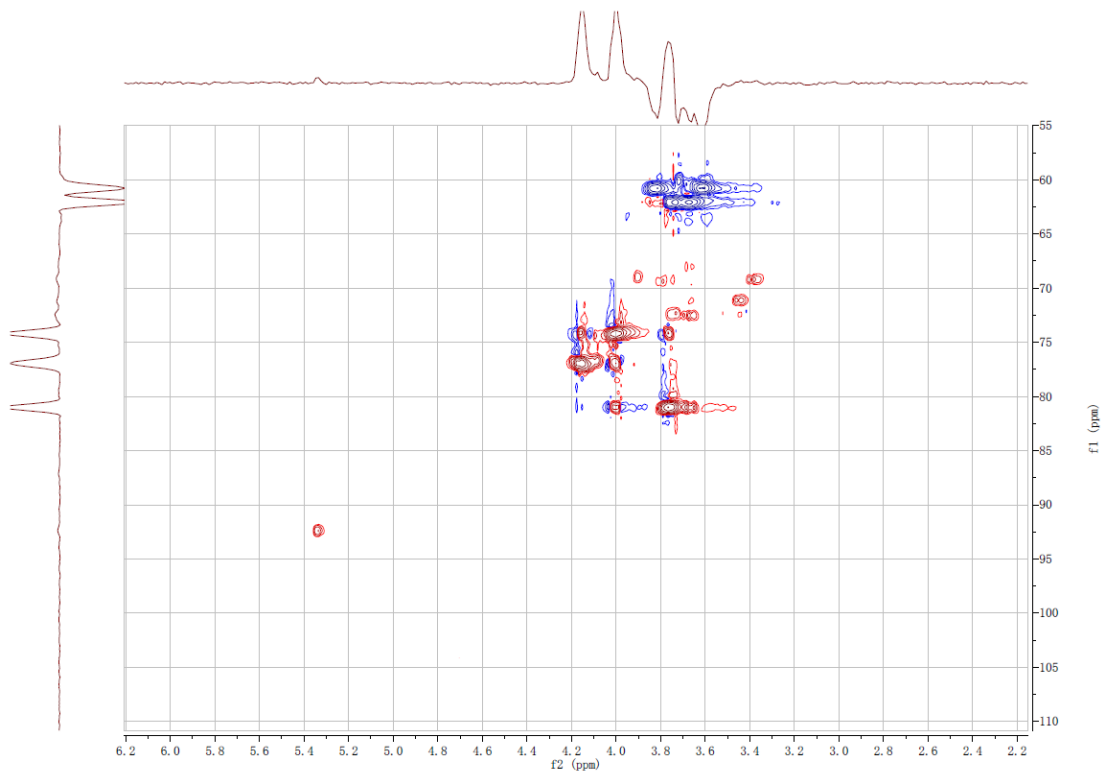

**S5: HSQC spectrum of Fructan 3.**

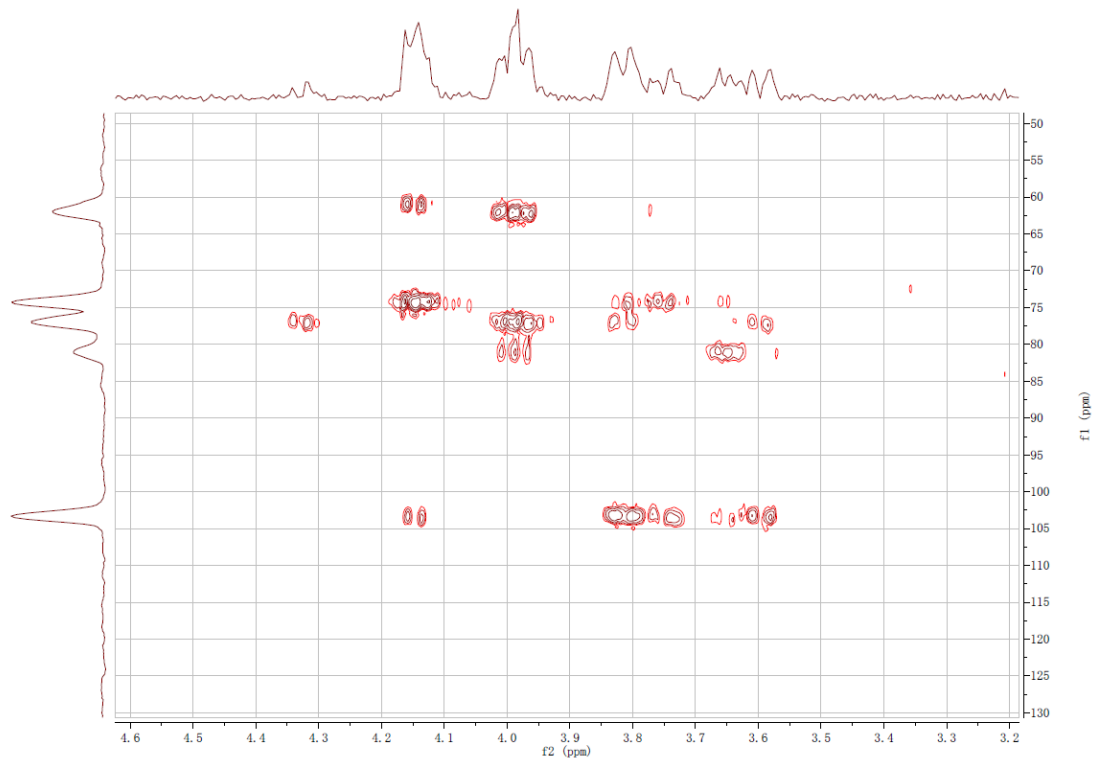

**S6: HMBC spectrum of Fructan 3.**
